# Supplementary material for: Wnt signaling directs human pluripotent stem cells into vascularized cardiac organoids with chamber-like structures
Source: PubMed Central journal article supplement (PMC9715615; doi:10.3389/fbioe.2022.1059243), 2022-11-18
Supplement: DataSheet1.pdf [file DataSheet1.pdf]

## *Supplementary Material*

# **Wnt Signaling Directs Human Pluripotent Stem Cells into Vascularized Cardiac Organoids with Chamber-like Structures**

**Po-Yu Liang<sup>1#</sup>, Yun Chang<sup>1,2#</sup>, Gyuhung Jin<sup>1,2</sup>, Xiaojun Lian<sup>3,\*</sup>, Xiaoping Bao<sup>1,2\*</sup>**

<sup>1</sup>Dacidson School of Chemical Engineering, Purdue University, West Lafayette, IN, USA

<sup>2</sup>Purdue University Center for Cancer Research, West Lafayette, IN, USA

<sup>3</sup>Department of Biomedical Engineering, The Huck Institutes of the Life Sciences, Department of Biology, The Pennsylvania State University, University Park, PA, USA

**\* Correspondence:**

Xiaojun Lian  
lian@psu.edu

Xiaoping Bao  
bao61@purdue.edu

**#These authors contributed equally**

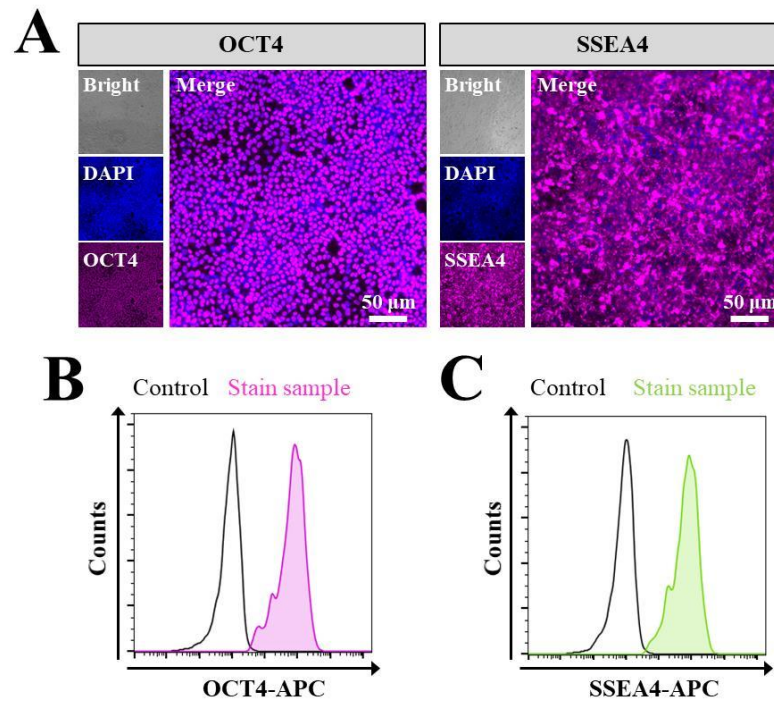

**Supplementary Figure 1.** Pluripotent stem cell marker characterization. (A) Fluorescence images of OCT4 and SSEA4 expression. Flow analysis of OCT4 (B) and SSEA4 (C) expression.

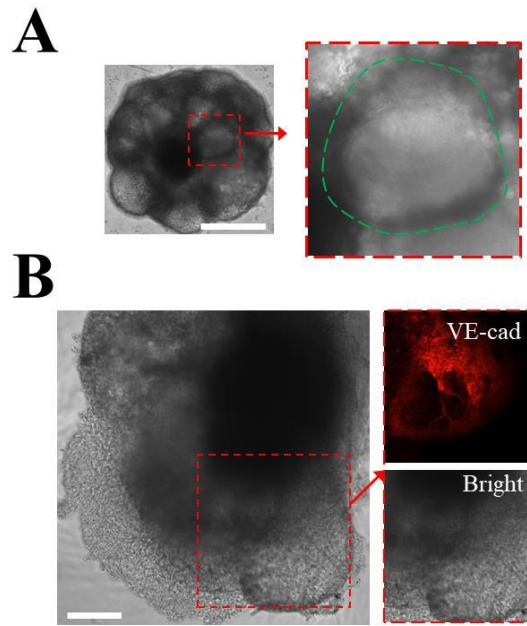

**Supplementary Figure 2.** Chamber characterization. (A) Brightfield images of cardiac organoids. (B) Representative fluorescence images of VE-cad expression inside cardiac organoids.

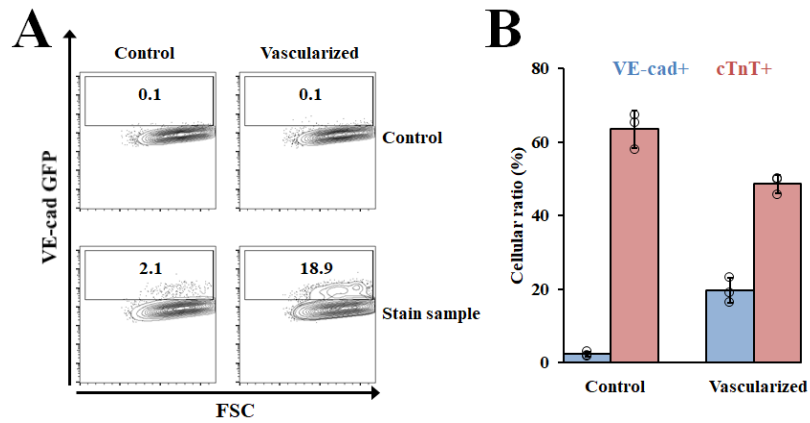

**Supplementary Figure 3.** Flow cytometry analysis of cardiac endothelial cells (CECs) and cardiomyocytes (CMs) in hPSC-derived organoids. (A) Representative flow cytometry analysis of VE-cad-GFP expression within the indicated cardiac organoids was shown. (B) The percentages of CECs and CMs within indicated cardiac organoids were quantified and shown.

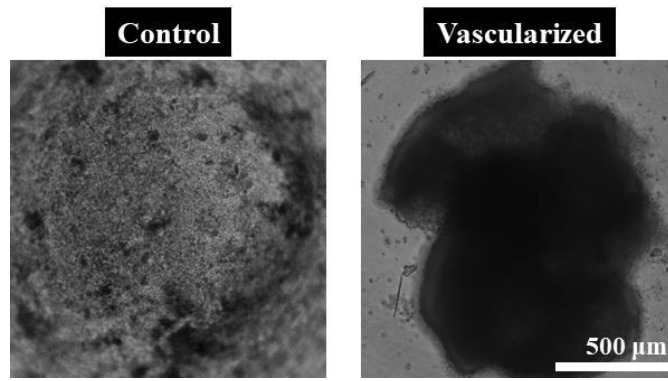

**Supplementary Figure 4.** Brightfield images of different cardiac organoids after the treatment with Temozolomide.
